# Supplementary material
Source: ML conference proceedings conference paper supplement (https://openaccess.thecvf.com/content/WACV2025/html/Gouidis_Recognizing_Unseen_States_WACV_2025_paper.html)
Supplement: Supplementary file 1 [file Gouidis_Recognizing_Unseen_States_WACV_2025_supplemental.pdf]

# Recognizing Unseen States of Unknown Objects by Leveraging Knowledge Graphs -Supplementary Material-

Filippos Gouidis<sup>1,2</sup>

Konstantinos Papoutsakis<sup>3</sup>

Theodore Patkos<sup>1</sup>

Antonis Argyros<sup>1,2</sup>

Dimitris Plexousakis<sup>1,2</sup>

<sup>1</sup> Foundation for Research and Technology-Hellas, Greece

<sup>2</sup> University of Crete, Greece <sup>3</sup> Hellenic Mediterranean University, Greece

{gouidis, patkos, argyros, dp}@ics.forth.gr, kpapoutsakis@hmu.gr

## 1. Datasets Details

**Table 1** presents the following details for each dataset: i) the number of the training, validation and test samples; ii) the number of state and object classes; iii) the valid and iv) the total object-state combinations and v) the average number of states in which an object can be situated.

## 2. Evaluation of the CW and OW versions

The results for the Open World (OW) and Closed World (CW) versions of the models are shown in **Table 2** and **Table 3**, respectively. For the OW settings our method continues to outperform the competing methods, although the performance gain has predictably been decreased. Moreover, w.r.t OSDD dataset, the 2nd best method is IVR [14], whereas CANET [12] is the 3rd best method. In the case of the CGQA-States dataset, the 2nd and 3rd best method is IVR [14] and CANET [12], respectively. Concerning the MIT-States dataset the 2nd best method is the IVR [14], whereas KG-SP [4] exhibits the 3rd best AUC score and CANET [12] the 3rd best HM score. Finally, in the case of the VAW dataset, the 2nd best performance is achieved by CANET [12], while IVR [14] ranks 3rd.

Regarding the CW settings, our method ranks 1st for the OSDD, VAW and MIT-states datasets and 4th for the CGQA-states dataset. Regarding the OSDD dataset, IVR [14] exhibits the 2nd best performance and KG-SP [4] the 3rd best performance. In the case of MIT-States dataset, CompCos [7] achieves the 2nd best performance and ADE [2] the 3rd best performance. Concerning the CGQA-states dataset, the best performance is achieved by CANET [12], the 2nd best by CompCos [7] and the 3rd best by OADiS [13]. Finally, regarding VAW, the 2nd best method is ADE [2] and the 3rd best method is CANET [12].

## 3. Additional Results of the Ablation Study

**Table 4** outlines the details of the employed KGs, while **Table 5** summarizes the performance of all ablated models across the four datasets.

1st Sub-table (GNN Architectures): The Tr-GCN-based model CN+WN\_H2.TH.GCN demonstrates the best overall performance.

2nd Sub-table (KGs): The ConceptNet-based model CN\_H2.TH.Tr-GCN achieves the highest scores.

3rd Sub-table (Hops): Most models achieve their best performance with two hops.

4th Sub-table (Node Policy): Adopting a node policy slightly improves the performance of most models.

Notably, while CN\_H2.TH.Tr-GCN achieves the best scores on two of the three datasets, CN+WN\_H2.TH.GCN was selected for comparison with competing methods, as this selection was based on aggregate averages across all four categories.

In seen classes, the model using unrelated embeddings (CN\_H3.UN.Tr-GCN) achieves similar accuracy to its counterpart with standard embeddings (CN\_H3.Tr-GCN). However, CN\_H3.UN.Tr-GCN performs significantly worse in unseen classes, with its HM and AUC scores being three to four times lower than those of CN\_H3.Tr-GCN. In contrast, the random model performs poorly across all metrics.

The key distinction between CN\_H3.UN.Tr-GCN and the random model lies in their embedding distributions: in the former, the GNN enables a balanced and representative distribution, while in the latter, the distribution is entirely random. This suggests that fine-tuning can yield competitive accuracy for seen classes even when embeddings are unrelated to target labels, provided they are distributed effectively. However, for unseen classes, accuracy depends on a precise mapping between embeddings and target labels.

| Dataset         | Train | Val   | Test  | States | Objects | VOSC | TOSC | S\O  |
|-----------------|-------|-------|-------|--------|---------|------|------|------|
| OSDD [1]        | 6,977 | 1,124 | 5,275 | 9      | 14      | 35   | 126  | 2.36 |
| CGQA-states [7] | 244   | 46    | 806   | 5      | 17      | 41   | 75   | 1.71 |
| MIT-states [3]  | 170   | 34    | 274   | 5      | 14      | 20   | 70   | 1.57 |
| VAW [10]        | 2,752 | 516   | 1,584 | 9      | 23      | 51   | 207  | 2.61 |

Table 1. Details about the four image datasets utilized in this work. Train/Val/Test: Number of Training/Validation/Testing Images. States: Number of State classes, Objects: Number of Object classes. VOSC/TOSC: Valid/Total Object-State combinations. S\O: Average number of states than an Object can be situated in.

| Method       | OSDD |      |             |             | CGQA-States |      |             |             | MIT-States |      |             |             | VAW  |      |             |             |
|--------------|------|------|-------------|-------------|-------------|------|-------------|-------------|------------|------|-------------|-------------|------|------|-------------|-------------|
|              | S    | Un   | HM          | AUC         | S           | Un   | HM          | AUC         | S          | Un   | HM          | AUC         | S    | Un   | HM          | AUC         |
| AoP [9]      | 69.9 | 33.3 | 31.6        | 13.3        | 14.5        | 4.3  | 4.4         | 0.3         | 36.4       | 4.8  | 8.4         | 1.3         | 59.6 | 5.4  | 6.1         | 1.3         |
| LE+ [8]      | 71.6 | 14.3 | 20.8        | 6.5         | 29.1        | 4.0  | 7.0         | 0.6         | 45.5       | 14.9 | 15.1        | 4.3         | 23.7 | 12.3 | 13.7        | 0.4         |
| TMN [11]     | 73.4 | 43.6 | 33.7        | 19.0        | 45.5        | 29.7 | 19.3        | 6.1         | 69.7       | 18.4 | 22.4        | 6.3         | 77.6 | 35.5 | 26.8        | 14.3        |
| SymNet [6]   | 77.7 | 14.0 | 21.1        | 7.5         | 94.0        | 7.1  | 13.7        | 6.1         | 97.0       | 1.9  | 2.1         | 0.9         | 82.2 | 3.1  | 3.5         | 1.2         |
| CompCos [7]  | 78.7 | 31.5 | 42.0        | 22.1        | 95.5        | 4.0  | 7.7         | 3.4         | 75.8       | 2.5  | 4.9         | 1.2         | 75.8 | 2.5  | 4.9         | 1.2         |
| KG-SP [4]    | 77.0 | 29.8 | 35.4        | 17.9        | 94.0        | 16.9 | 26.1        | 12.7        | 97.0       | 15.5 | 22.6        | 12.0        | 74.3 | 12.3 | 17.6        | 8.6         |
| SCEN-NET [5] | 75.8 | 25.5 | 26.3        | 10.7        | 83.6        | 7.4  | 13.6        | 5.9         | 36.4       | 8.5  | 13.0        | 1.6         | 22.0 | 12.0 | 11.1        | 2.5         |
| IVR [14]     | 78.8 | 61.6 | <b>44.2</b> | <b>30.8</b> | 94.0        | 40.3 | <b>37.4</b> | <b>26.4</b> | 96.9       | 22.5 | <b>24.5</b> | <b>14.9</b> | 87.2 | 37.4 | <u>29.7</u> | <u>18.2</u> |
| OADiS [13]   | 76.5 | 20.5 | 27.1        | 10.7        | 94.8        | 26.3 | 20.3        | 12.0        | 93.9       | 29.1 | 23.4        | <u>12.5</u> | 82.8 | 8.9  | 11.0        | 4.2         |
| CANET [12]   | 79.2 | 43.9 | <u>43.7</u> | <u>27.2</u> | 95.5        | 51.3 | <u>41.9</u> | <u>26.1</u> | 96.9       | 19.3 | <u>22.7</u> | 11.4        | 90.1 | 53.9 | <b>40.4</b> | <b>29.7</b> |
| ADE [2]      | 80.2 | 27.6 | 32.3        | 12.3        | 95.5        | 16.3 | 25.7        | 12.8        | 78.8       | 4.5  | 4.7         | 0.8         | 80.8 | 22.3 | 14.3        | 8.4         |
| OaSC (Ours)  | 87.7 | 69.9 | <b>48.6</b> | <b>39.8</b> | 97.1        | 73.4 | <b>43.6</b> | <b>36.5</b> | 85.7       | 69.9 | <b>51.1</b> | <b>41.2</b> | 83.7 | 58.6 | <b>42.9</b> | <b>32.8</b> |

Table 2. Aggregate results for Open World Versions. S: Best Accuracy on seen classes. UN: Best accuracy on unseen classes. HM: Best harmonic mean. AUC: Area under curve for the pairs of accuracy for seen and unseen classes. Red/Bold/Underlined text indicates best/2nd best/3rd best performance.

| Method       | OSDD |      |             |             | CGQA-States |      |             |             | MIT-States |      |             |             | VAW  |      |             |             |
|--------------|------|------|-------------|-------------|-------------|------|-------------|-------------|------------|------|-------------|-------------|------|------|-------------|-------------|
|              | S    | UN   | HM          | AUC         | S           | UN   | HM          | AUC         | S          | UN   | HM          | AUC         | S    | UN   | HM          | AUC         |
| AoP [9]      | 75.9 | 53.5 | 32.2        | 19.5        | 95.5        | 50.0 | 35.9        | 27.8        | 48.5       | 20.9 | 15.1        | 4.1         | 55.1 | 44.7 | 24.1        | 11.6        |
| LE+ [8]      | 68.6 | 31.7 | 34.5        | 16.9        | 93.5        | 16.1 | 16.1        | 8.1         | 63.6       | 14.6 | 20.3        | 7.1         | 41.6 | 2.3  | 2.6         | 1.2         |
| TMN [11]     | 71.5 | 49.8 | 35.0        | 20.8        | 97.0        | 76.0 | 39.9        | 32.2        | 84.9       | 30.7 | 27.4        | 16.1        | 82.6 | 55.5 | 37.3        | 25.6        |
| SymNet [6]   | 77.7 | 59.4 | 44.2        | <u>31.0</u> | 95.5        | 27.4 | 39.4        | 24.4        | 96.9       | 27.5 | 26.8        | 15.7        | 89.2 | 46.6 | 40.0        | 27.4        |
| CompCos [7]  | 76.3 | 45.3 | 38.7        | 23.8        | 92.5        | 73.9 | <b>48.1</b> | <b>41.5</b> | 100.0      | 44.9 | <b>32.3</b> | <b>23.8</b> | 88.4 | 51.4 | 39.3        | 29.1        |
| KG-SP [4]    | 78.0 | 55.0 | <b>47.6</b> | 29.7        | 95.5        | 17.7 | 27.2        | 13.5        | 97.1       | 15.5 | 22.6        | 12.0        | 89.4 | 37.3 | 39.3        | 23.4        |
| SCEN-NET [5] | 75.1 | 45.6 | 39.4        | 22.7        | 94.1        | 53.4 | 41.1        | 31.0        | 84.9       | 23.1 | 22.1        | 11.5        | 90.5 | 44.2 | 37.7        | 23.5        |
| IVR [14]     | 78.4 | 60.5 | <u>46.0</u> | <b>31.8</b> | 94.0        | 43.4 | 35.2        | 25.2        | 87.9       | 28.8 | 27.1        | 14.0        | 86.7 | 38.2 | 30.5        | 18.5        |
| OADiS [13]   | 78.7 | 59.7 | 38.3        | 26.2        | 95.5        | 78.6 | 43.5        | <u>36.7</u> | 93.9       | 29.4 | 28.3        | 17.2        | 89.9 | 61.8 | 39.8        | <u>30.5</u> |
| CANET [12]   | 80.3 | 43.6 | 45.1        | 27.9        | 95.5        | 64.9 | <b>50.0</b> | <b>43.3</b> | 96.9       | 23.0 | 28.2        | 15.9        | 90.3 | 54.6 | <u>40.8</u> | <u>30.5</u> |
| ADE [2]      | 82.0 | 42.5 | 35.9        | 20.6        | 94.8        | 58.3 | <u>45.5</u> | 34.9        | 93.9       | 27.5 | <u>30.4</u> | <u>19.2</u> | 90.7 | 45.0 | <b>40.9</b> | <b>30.6</b> |
| OaSC (Ours)  | 87.7 | 69.9 | <b>48.6</b> | <b>39.8</b> | 97.1        | 73.4 | 43.6        | 36.5        | 85.7       | 69.9 | <b>51.1</b> | <b>41.2</b> | 83.7 | 58.6 | <b>42.9</b> | <b>32.8</b> |

Table 3. Aggregate results for Closed World Versions. S: Best Accuracy on seen classes. UN: Best accuracy on unseen classes. HM: Best harmonic mean. AUC: Area under curve for the pairs of accuracy for seen and unseen classes. Red/Bold/Underlined text indicates best/2nd best/3rd best performance.

| KG          | N                               | E                                 | RT | RC    |
|-------------|---------------------------------|-----------------------------------|----|-------|
| WN_H2       | 70 / 54 / 49 / 79               | 321 / 223 / 105 / 365             | 5  | LX    |
| WN_H3       | 429 / 311 / 295 / 465           | 873 / 680 / 655 / 912             | 5  | LX    |
| CN_H2       | 715 / 552 / 504 / 743 /         | 2,132 / 1,981 / 1,864 / 2,342     | 13 | CS    |
| CN_H3       | 2,139 / 1,872 / 1,788 / 2,349 / | 2,542 / 2,194 / 2,103 / 2,874     | 24 | CS    |
| CN_H2_TH    | 611 / 505 / 485 / 785           | 1,710 / 1,521 / 1,415 / 1,956     | 12 | CS    |
| CN_H3_TH    | 12,733 / 9,839 / 9,212 / 13,045 | 29,794 / 25,105 / 24,292 / 32,456 | 29 | CS    |
| CN+WN_H2    | 667 / 581 / 506 / 845           | 1,906 / 1,682 / 1,602 / 2,136     | 13 | CS    |
| CN+WN_H2_TH | 590 / 492 / 431 / 705           | 1,442 / 1,167 / 1,089 / 1,673     | 12 | CS/LX |
| CN+WN_H3_TH | 10,165 / 8,842 / 7,948 / 12,116 | 26,735 / 23,176 / 22,602 / 29,672 | 29 | CS/LX |

Table 4. KGs Details. N: Number of Nodes. E: Number of Edges. RT: Number of Different Relation Types between nodes. RC: Category of Relation Types. CS: Common-Sense. LX: Lexicographic. First/Second/Third/Fourth number in the N and E columns refers to the KG for OSDD/CGQA-States/MIT-States/ VAW dataset, respectively.

| Method             | OSDD |      |             |             | CGQA-States |      |             |             | MIT-States |      |             |             | VAW  |      |             |             |
|--------------------|------|------|-------------|-------------|-------------|------|-------------|-------------|------------|------|-------------|-------------|------|------|-------------|-------------|
|                    | S    | Un   | HM          | AUC         | S           | UN   | HM          | AUC         | S          | UN   | HM          | AUC         | S    | UN   | HM          | AUC         |
| CN_H3_LSTM         | 85.1 | 38.0 | 38.0        | 24.3        | 96.4        | 57.1 | 37.3        | 27.0        | 92.9       | 65.4 | 50.9        | 36.9        | 55.7 | 43.9 | 22.1        | 12.5        |
| CN_H3_GCN          | 86.7 | 58.5 | <b>44.1</b> | <b>34.0</b> | 95.7        | 62.5 | 40.0        | 28.7        | 88.1       | 66.7 | 47.1        | 32.2        | 70.3 | 49.5 | 30.2        | 20.8        |
| CN_H3_R-GCN        | 87.7 | 49.0 | 42.7        | 30.4        | 95.7        | 71.4 | <b>40.9</b> | <b>34.0</b> | 78.6       | 73.4 | 47.4        | 32.9        | 79.5 | 57.5 | 38.9        | 28.8        |
| CN_H3_Tr-GCN       | 87.4 | 42.2 | 40.2        | 27.7        | 93.6        | 56.3 | 39.2        | 28.8        | 88.1       | 67.0 | <b>53.6</b> | <b>43.7</b> | 80.2 | 56.8 | <b>40.7</b> | <b>29.9</b> |
| WN_H3_LSTM         | 86.0 | 60.0 | <b>43.3</b> | <b>33.9</b> | 96.4        | 13.4 | 16.6        | 8.7         | 90.5       | 24.4 | 24.2        | 13.2        | 37.4 | 55.6 | 18.1        | 10.2        |
| WN_H3_GCN          | 86.8 | 39.5 | 36.7        | 21.2        | 86.4        | 49.0 | 34.2        | 24.1        | 88.1       | 54.8 | <b>50.1</b> | <b>37.9</b> | 64.2 | 38.3 | 24.4        | 19.4        |
| WN_H3_R-GCN        | 85.5 | 36.0 | 36.5        | 22.1        | 93.6        | 52.9 | <b>40.5</b> | <b>28.9</b> | 78.6       | 47.4 | 42.9        | 21.4        | 69.7 | 56.0 | 38.9        | 28.8        |
| WN_H3_Tr-GCN       | 89.2 | 48.4 | 36.6        | 23.9        | 86.4        | 56.6 | 37.6        | 26.6        | 88.1       | 44.2 | 37.3        | 25.9        | 65.0 | 54.5 | <b>31.8</b> | <b>21.3</b> |
| CN_H2_TH_LSTM      | 86.5 | 50.0 | 43.0        | 28.8        | 97.1        | 71.7 | 38.8        | 31.9        | 78.6       | 60.3 | 47.8        | 26.0        | 61.0 | 52.6 | 27.9        | 17.9        |
| CN_H2_TH_GCN       | 84.6 | 52.8 | 43.7        | 30.7        | 95.7        | 67.5 | 40.5        | 32.0        | 85.7       | 73.1 | 46.6        | 29.4        | 74.3 | 48.3 | 36.4        | 27.4        |
| CN_H2_TH_R-GCN     | 85.9 | 48.0 | 41.2        | 28.5        | 95.0        | 63.6 | 41.6        | 31.6        | 81.0       | 69.2 | 51.8        | 30.0        | 82.4 | 57.6 | 40.5        | 31.5        |
| CN_H2_TH_Tr-GCN    | 85.7 | 63.7 | <b>45.6</b> | <b>34.5</b> | 97.1        | 70.0 | <b>43.5</b> | <b>35.6</b> | 85.7       | 70.2 | <b>51.6</b> | <b>40.5</b> | 82.4 | 59.4 | <b>38.0</b> | <b>32.6</b> |
| WN_H2_Tr-GCN       | 87.9 | 23.0 | 28.6        | 13.0        | 92.9        | 53.8 | <b>38.2</b> | <b>28.1</b> | 83.3       | 45.8 | <b>39.7</b> | <b>27.3</b> | 69.7 | 45.8 | 30.5        | 18.3        |
| WN_H3_Tr-GCN       | 89.2 | 48.4 | <b>36.6</b> | <b>23.9</b> | 86.4        | 56.6 | 37.6        | 26.6        | 88.1       | 44.2 | 37.3        | 25.9        | 65.0 | 54.5 | <b>31.8</b> | <b>21.3</b> |
| CN_H2_Tr-GCN       | 86.4 | 60.6 | <b>45.1</b> | <b>34.3</b> | 97.1        | 73.4 | <b>46.3</b> | <b>39.5</b> | 88.1       | 69.6 | <b>56.2</b> | <b>43.5</b> | 82.4 | 58.9 | <b>37.3</b> | <b>32.0</b> |
| CN_H3_Tr-GCN       | 87.4 | 42.2 | 40.2        | 27.7        | 93.6        | 56.3 | 39.2        | 28.8        | 88.1       | 67.0 | 53.6        | 43.7        | 81.1 | 48.3 | 36.9        | 26.3        |
| CN_H3_UN_Tr-GCN    | 85.7 | 14.8 | <b>17.0</b> | <b>7.6</b>  | 93.6        | 13.2 | <b>15.1</b> | <b>7.4</b>  | 83.3       | 26.6 | <b>20.6</b> | <b>7.6</b>  | 83.1 | 10.2 | <b>14.8</b> | <b>5.3</b>  |
| RN_Tr-GCN          | 12.9 | 11.3 | 3.2         | 1.6         | 15.7        | 9.7  | 5.1         | 2.5         | 26.7       | 24.2 | 12.5        | 4.6         | 12.0 | 9.8  | 3.0         | 1.3         |
| CN+WN_H2_Tr-GCN    | 85.7 | 60.9 | 45.2        | 33.9        | 97.1        | 72.0 | <b>46.0</b> | <b>38.9</b> | 88.1       | 68.9 | 55.3        | 43.3        | 82.0 | 58.9 | 39.8        | 32.6        |
| CN+WN_H2_TH_Tr-GCN | 87.7 | 69.9 | <b>48.6</b> | <b>39.8</b> | 97.1        | 73.4 | 43.6        | 36.5        | 85.7       | 69.9 | <b>51.1</b> | <b>41.2</b> | 83.7 | 58.6 | <b>42.9</b> | <b>32.8</b> |
| WN_H2_Tr-GCN       | 87.9 | 23.0 | 28.6        | 13.0        | 92.9        | 53.8 | <b>38.2</b> | <b>28.1</b> | 83.3       | 45.8 | <b>39.7</b> | <b>27.3</b> | 69.7 | 45.8 | 30.5        | 18.3        |
| WN_H3_Tr-GCN       | 89.2 | 48.4 | <b>36.6</b> | <b>23.9</b> | 86.4        | 56.6 | 37.6        | 26.6        | 88.1       | 44.2 | 37.3        | 25.9        | 65.0 | 54.5 | <b>31.8</b> | <b>21.3</b> |
| CN_H2_Tr-GCN       | 86.4 | 60.6 | 45.1        | 34.3        | 97.1        | 73.4 | <b>46.3</b> | <b>39.5</b> | 88.1       | 69.6 | <b>56.2</b> | <b>43.5</b> | 82.4 | 58.9 | <b>37.3</b> | <b>32.0</b> |
| CN_H3_Tr-GCN       | 87.4 | 42.2 | <b>40.2</b> | <b>27.7</b> | 93.6        | 56.3 | 39.2        | 28.8        | 88.1       | 67.0 | 53.6        | 43.7        | 80.2 | 56.8 | 40.7        | 29.9        |
| CN+WN_H2_TH_Tr-GCN | 87.7 | 69.9 | <b>48.6</b> | <b>39.8</b> | 97.1        | 73.4 | <b>43.6</b> | <b>36.5</b> | 85.7       | 69.9 | 51.1        | 41.2        | 83.7 | 58.6 | <b>42.9</b> | <b>32.8</b> |
| CN+WN_H3_TH_Tr-GCN | 87.1 | 56.3 | 44.6        | 31.9        | 97.1        | 60.5 | 41.0        | 32.5        | 83.3       | 68.6 | <b>55.9</b> | <b>41.0</b> | 80.6 | 59.2 | 38.8        | 30.6        |
| WN_H3_Tr-GCN       | 87.3 | 46.4 | <b>35.7</b> | 23.0        | 85.5        | 53.6 | 35.3        | 25.2        | 87.2       | 44.3 | <b>37.4</b> | 25.7        | 65.0 | 54.5 | 31.8        | 21.3        |
| WN_H3_TH_Tr-GCN    | 89.2 | 48.4 | 36.6        | <b>23.9</b> | 86.4        | 56.6 | <b>37.6</b> | <b>26.6</b> | 88.1       | 44.2 | 37.3        | <b>25.9</b> | 68.1 | 56.0 | <b>32.7</b> | <b>23.4</b> |
| CN_H2_Tr-GCN       | 86.4 | 60.6 | 45.1        | 34.3        | 97.1        | 73.4 | <b>46.3</b> | <b>39.5</b> | 88.1       | 69.6 | <b>56.2</b> | <b>43.5</b> | 82.4 | 58.9 | 37.3        | 32.0        |
| CN_H2_TH_Tr-GCN    | 85.7 | 63.7 | <b>45.6</b> | <b>34.5</b> | 97.1        | 70.0 | 43.5        | 35.6        | 85.7       | 70.2 | 51.6        | 40.5        | 82.4 | 59.4 | <b>38.0</b> | <b>32.6</b> |

Table 5. Ablation Study. 1st section of the table: comparison for the GNN architecture. 2nd section: comparison for the KG source. 3rd section: comparison for max number of hops. 4th section: comparison for the node inclusion policy. Bold font indicates top performance across ablation category. Blue colour indicates top performance across ablation subcategory. S: Best Accuracy on seen classes. UN: Best accuracy on unseen classes. HM: Best harmonic mean. AUC: Area under curve for the pairs of accuracy for seen and unseen classes. CN: ConceptNet-based model. WN: WordNet-based model. UN: Embeddings corresponding to concepts unrelated to the target classes. RN: Random embeddings. H2(3): Maximum number of hops equal to 2(3). TH: Thresholding policy for the nodes of the KG.

## References

- [1] Gouidis, F., Patkos, T., Argyros, A., Plexousakis, D.: Detecting object states vs detecting objects: A new dataset and a quantitative experimental study. In: Proceedings of the 17th International Joint Conference on Computer Vision, Imaging and Computer Graphics Theory and Applications (VISAPP). vol. 5, pp. 590–600 (2022)
- [2] Hao, S., Han, K., Wong, K.Y.K.: Learning attention as disentangler for compositional zero-shot learning. In: Proceedings of the IEEE/CVF Conference on Computer Vision and Pattern Recognition. pp. 15315–15324 (2023)
- [3] Isola, P., Lim, J.J., Adelson, E.H.: Discovering states and transformations in image collections. Proceedings of the IEEE Computer Society Conference on Computer Vision and Pattern Recognition **07-12-June**, 1383–1391 (2015). <https://doi.org/10.1109/CVPR.2015.7298744>
- [4] Karthik, S., Mancini, M., Akata, Z.: Kg-sp: Knowledge guided simple primitives for open world compositional zero-shot learning. In: 35th IEEE Conference on Computer Vision and Pattern Recognition. IEEE (2022)
- [5] Li, X., Yang, X., Wei, K., Deng, C., Yang, M.: Siamese contrastive embedding network for compositional zero-shot learning. In: Proceedings of the IEEE/CVF Conference on Computer Vision and Pattern Recognition. pp. 9326–9335 (2022)
- [6] Li, Y.L., Xu, Y., Mao, X., Lu, C.: Symmetry and group in attribute-object compositions pp. 11316–11325 (2020)
- [7] Mancini, M., Naeem, M.F., Xian, Y., Akata, Z.: Learning Graph Embeddings for Open World Compositional Zero-Shot Learning. IEEE Transactions on Pattern Analysis and Machine Intelligence **8828**(c), 1–15 (2022). <https://doi.org/10.1109/TPAMI.2022.3163667>
- [8] Misra, I., Gupta, A., Hebert, M.: From red wine to red tomato: Composition with context. In: Proceedings of the IEEE Conference on Computer Vision and Pattern Recognition. pp. 1792–1801 (2017)
- [9] Nagarajan, T., Grauman, K.: Attributes as operators: factorizing unseen attribute-object compositions. In: Proceedings of the European Conference on Computer Vision (ECCV). pp. 169–185 (2018)
- [10] Pham, K., Kafle, K., Lin, Z., Ding, Z., Cohen, S., Tran, Q., Shrivastava, A.: Learning to predict visual attributes in the wild. In: Proceedings of the IEEE/CVF CVPR. pp. 13018–13028 (June 2021)
- [11] Purushwalkam, S., Nickel, M., Gupta, A., Ranzato, M.: Task-driven modular networks for zero-shot compositional learning. In: Proceedings of the IEEE/CVF International Conference on Computer Vision. pp. 3593–3602 (2019)
- [12] Qingsheng Wang, Lingqiao Liu, C.J.H.C.G.L.P.W.C.S.: Learning conditional attributes for compositional zero-shot learning. In: CVPR (2023)
- [13] Saini, N., Pham, K., Shrivastava, A.: Disentangling visual embeddings for attributes and objects. In: Proceedings of the IEEE/CVF Conference on Computer Vision and Pattern Recognition (CVPR). pp. 13658–13667 (June 2022)
- [14] Zhang, T., Liang, K., Du, R., Sun, X., Ma, Z., Guo, J.: Learning invariant visual representations for compositional zero-shot learning. In: ECCV (2022)
